# Supplementary material
Source: publisher figshare collection journal article supplement (https://acs.figshare.com/ndownloader/files/3966193)
Supplement: Supplementary file 1 [file 3966193]

# **First-principles study on the origin of low charging overpotential of the sodium oxygen batteries**

Byungju Lee<sup>1</sup>, Dong-Hwa Seo<sup>2</sup>, Hee-Dae Lim<sup>1</sup>, Inchul Park<sup>1</sup>, Kyu-Young Park<sup>1</sup>, Jinsoo Kim<sup>1</sup>, and Kisuk Kang<sup>2,\*</sup>

<sup>1</sup>Department of Materials Science and Engineering, Seoul National University, Seoul, 151-742, Republic of Korea

<sup>2</sup>Department of Materials Science and Engineering, Research Institute of Advanced Materials, Seoul National University, Seoul, 151-742, Republic of Korea

Supplementary Material

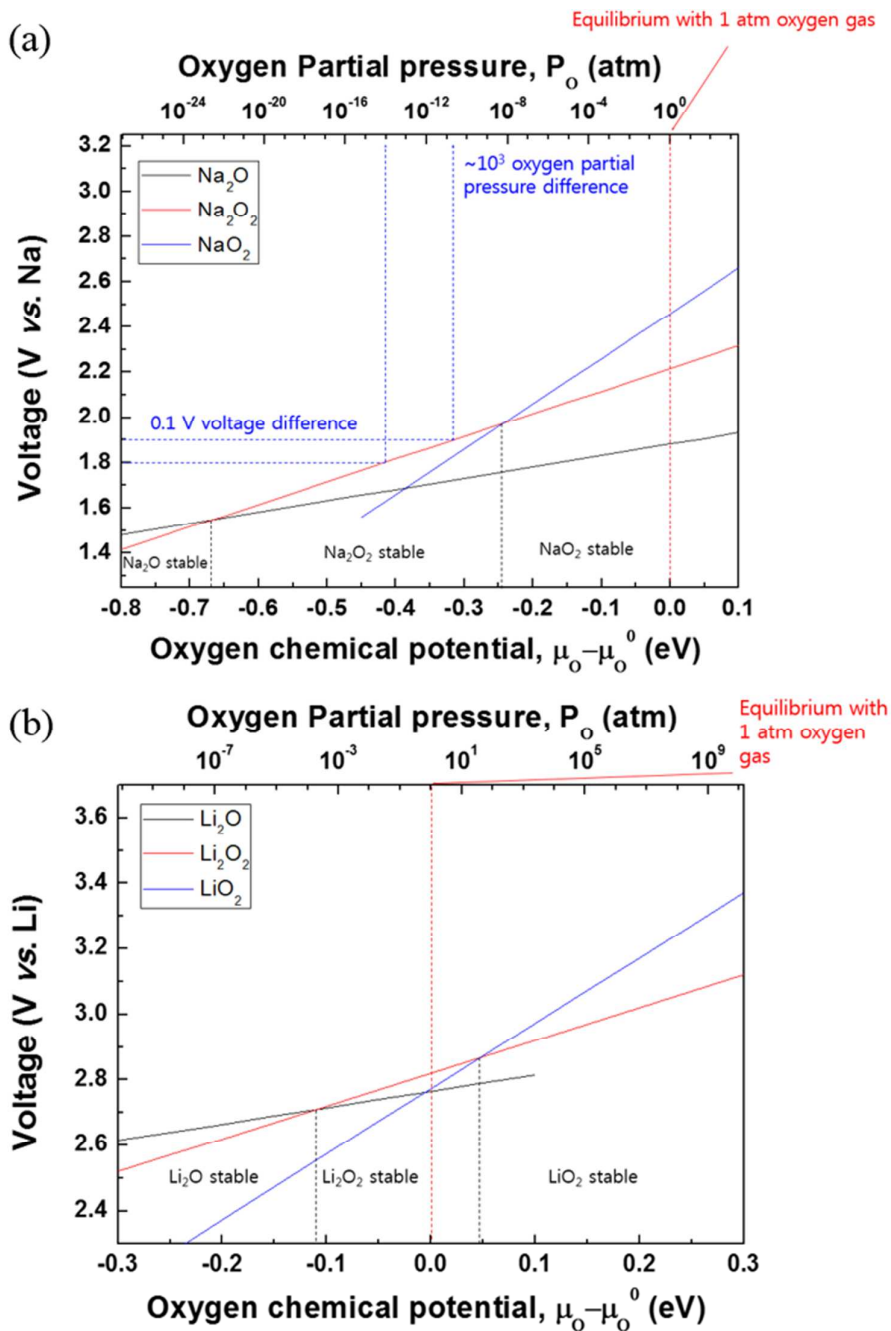

**Figure S1.** Relationship between cell voltage and oxygen partial pressure, (a) in the Na/O<sub>2</sub> cell and (b) in the Li/O<sub>2</sub> cell. Higher cell voltage is related with more negative Gibbs free energy, according to Nernst equation;  $\mu_{\text{metal}} - \mu_{\text{metal}}^0 = -nFE_{\text{cell}}$ , where  $\mu_{\text{metal}}$  is chemical potential of metal (Na or Li) in structure,  $\mu_{\text{metal}}^0$  is chemical potential of pure metal,  $n$  is the number of charge of metal ion,  $F$  is faraday constant,  $E_{\text{cell}}$  is the voltage of the cell.

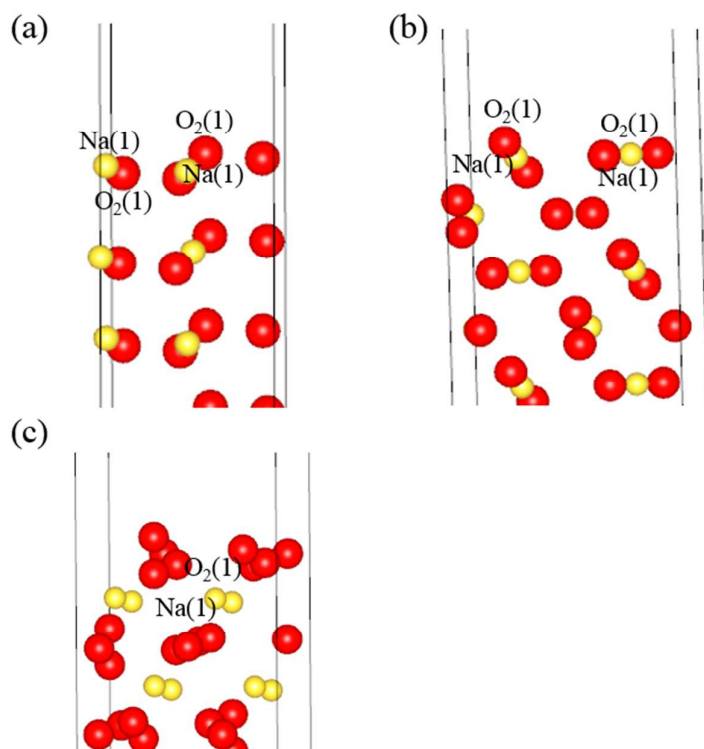

**Figure S2.** Surface unit cells of pyrite  $\text{NaO}_2$ . The yellow and red atoms correspond to sodium and oxygen, respectively. Three low-index surfaces were considered. As termination with an O atom rather than an  $\text{O}_2$  dumbbell made the surface unstable, such terminations were not considered in this study.

| Orientation | Termination                     | Na <sub>2</sub> O <sub>2</sub> limit | O <sub>2</sub> limit |
|-------------|---------------------------------|--------------------------------------|----------------------|
| (100)       | O <sub>2</sub> (1)-Na(1)*       | 13                                   | 13                   |
|             | O <sub>2</sub> (1)              | 48                                   | 21                   |
|             | Na(1)                           | 128                                  | 156                  |
| (110)       | O <sub>2</sub> (1)-Na(1)-Na(2)* | 26                                   | 26                   |
|             | O <sub>2</sub> (1)              | 62                                   | 42                   |
|             | Na(1)-Na(2)                     | 51                                   | 70                   |
|             | O <sub>2</sub> (1)-Na(1)        | 28                                   | 18                   |
| (111)       | O <sub>2</sub> (1)              | 34                                   | 18                   |
|             | Na(1)                           | 42                                   | 58                   |

**Table S1.** Surface energies of pyrite NaO<sub>2</sub> for all possible terminations. The star symbols (\*) indicate stoichiometric surfaces. The most stable termination of each surface was used to construct the Wulff shape. (in meV/Å<sup>2</sup>)

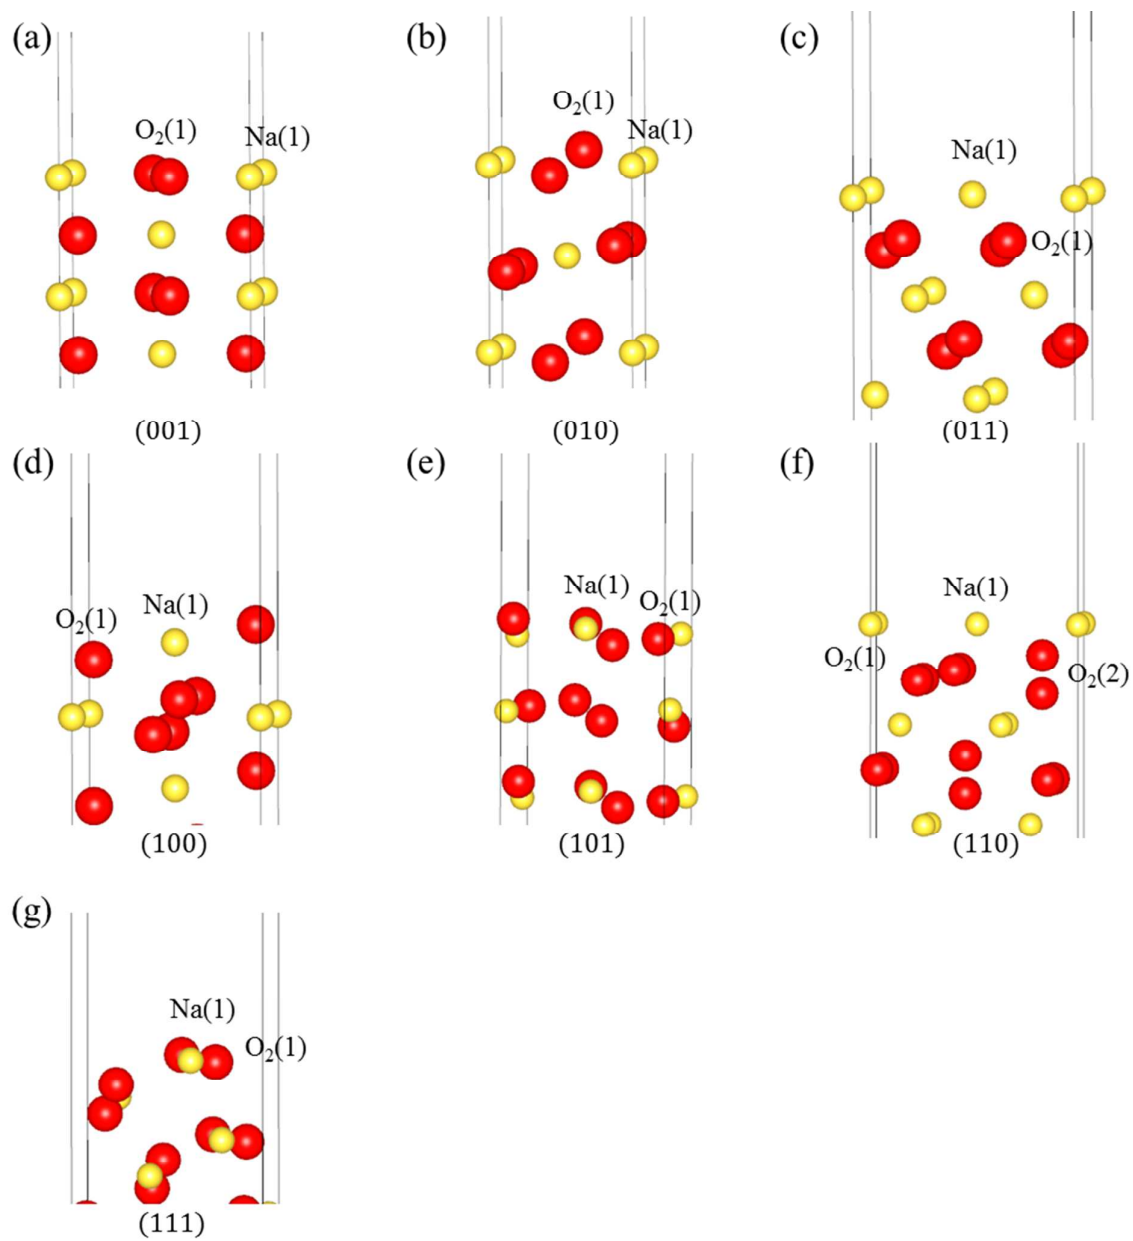

**Figure S3.** Surface unit cells of marcasite  $\text{NaO}_2$ . The yellow and red atoms correspond to sodium and oxygen, respectively. Seven low-index surfaces were considered.

| Orientation | Termination                                 | Na <sub>2</sub> O <sub>2</sub> limit | O <sub>2</sub> limit |
|-------------|---------------------------------------------|--------------------------------------|----------------------|
| (001)       | O <sub>2</sub> (1)-Na(1)*                   | 29                                   | 29                   |
|             | O <sub>2</sub> (1)                          | 35                                   | 15                   |
|             | Na(1)                                       | 68                                   | 89                   |
| (010)       | O <sub>2</sub> (1)-Na(1)*                   | 23                                   | 23                   |
|             | O <sub>2</sub> (1)                          | 52                                   | 18                   |
|             | Na(1)                                       | 140                                  | 174                  |
| (011)       | O <sub>2</sub> (1)-Na(1)                    | 57                                   | 75                   |
|             | O <sub>2</sub> (1)                          | 32                                   | 14                   |
| (100)       | O <sub>2</sub> (1)-Na(1)*                   | 37                                   | 37                   |
|             | O <sub>2</sub> (1)                          | 49                                   | 24                   |
|             | Na(1)                                       | 90                                   | 116                  |
| (101)       | O <sub>2</sub> (1)-Na(1)*                   | 16                                   | 16                   |
|             | O <sub>2</sub> (1)                          | 47                                   | 15                   |
|             | Na(1)                                       | 76                                   | 92                   |
| (110)       | Na(1)-O <sub>2</sub> (1)-O <sub>2</sub> (2) | 65                                   | 85                   |
|             | O <sub>2</sub> (1)-O <sub>2</sub> (2)       | 42                                   | 21                   |
|             | O <sub>2</sub> (1)*                         | 37                                   | 37                   |
|             | O <sub>2</sub> (2)*                         | 37                                   | 37                   |
| (111)       | O <sub>2</sub> (1)-Na(1)*                   | 25                                   | 25                   |
|             | O <sub>2</sub> (1)                          | 32                                   | 17                   |
|             | Na(1)                                       | 52                                   | 66                   |

**Table S2.** Surface energies of NaO<sub>2</sub> for all possible terminations. The star symbols (\*) indicate stoichiometric surfaces. (in meV/Å<sup>2</sup>)

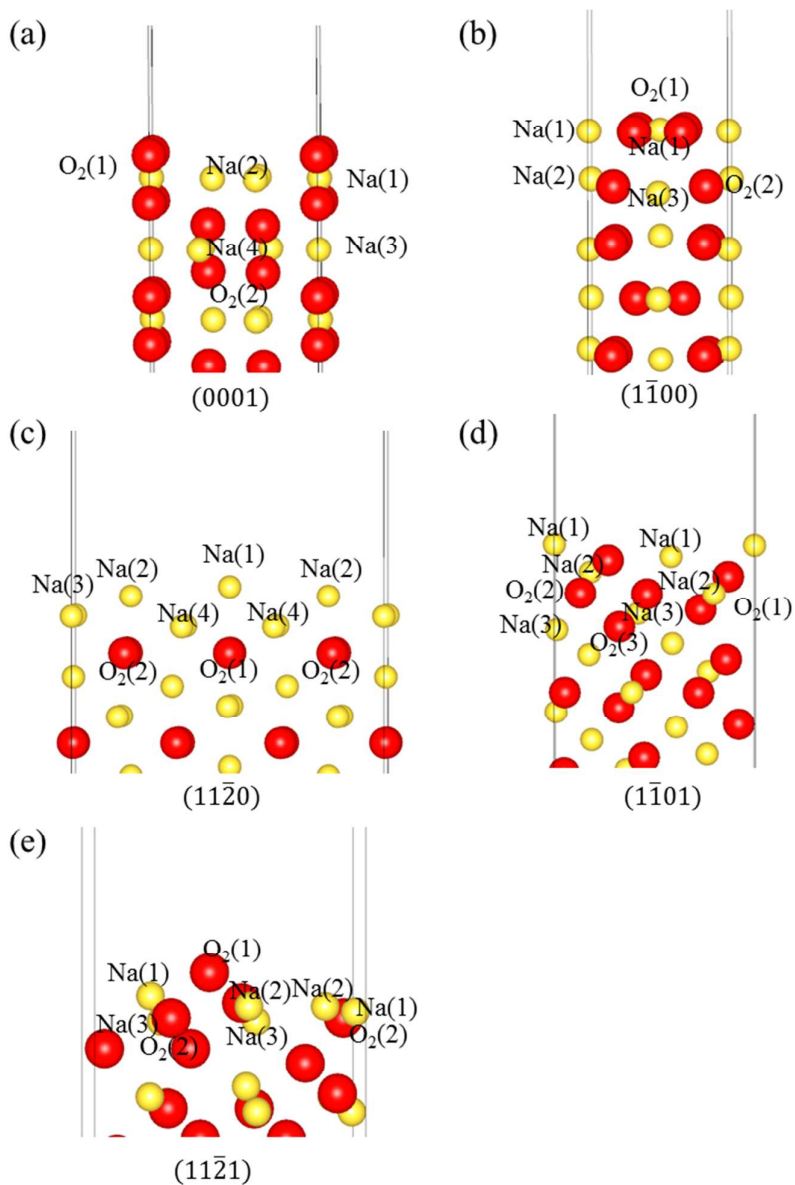

**Figure S4.** Surface unit cells of  $\text{Na}_2\text{O}_2$ . The yellow and red atoms correspond to sodium and oxygen, respectively. Five low-index surfaces were considered. There were many terminations because of the low symmetry of the  $\text{Na}_2\text{O}_2$  structure. The top and bottom surfaces of the  $(11\bar{2}0)$  and  $(11\bar{2}1)$  surfaces could not be terminated equally because of low symmetry, hence atoms that were positioned at the same crystallographic site were terminated.

| Orientation | Termination                                                                | Na <sub>2</sub> O limit | NaO <sub>2</sub> limit |
|-------------|----------------------------------------------------------------------------|-------------------------|------------------------|
| (0001)      | O <sub>2</sub> (1)-Na(1)-Na(2)-O <sub>2</sub> (2)-Na(3)-Na(4)              | 56                      | 62                     |
|             | Na(1)-Na(2)-O <sub>2</sub> (2)-Na(3)-Na(4)                                 | 150                     | 182                    |
|             | O <sub>2</sub> (1)-Na(2)-O <sub>2</sub> (2)-Na(3)-Na(4)                    | 43                      | 37                     |
|             | O <sub>2</sub> (1)-Na(1)-O <sub>2</sub> (2)-Na(3)-Na(4)                    | 48                      | 29                     |
|             | O <sub>2</sub> (1)-O <sub>2</sub> (2)-Na(3)-Na(4)                          | 73                      | 41                     |
|             | Na(1)-O <sub>2</sub> (2)-Na(3)-Na(4)                                       | 69                      | 76                     |
|             | Na(2)-O <sub>2</sub> (2)-Na(3)-Na(4)                                       | 36                      | 55                     |
|             | O <sub>2</sub> (2)-Na(3)-Na(4)                                             | 35                      | 28                     |
|             | O <sub>2</sub> (2)-Na(4)                                                   | 54                      | 34                     |
|             | O <sub>2</sub> (2)-Na(3)                                                   | 66                      | 34                     |
| (1100)      | O <sub>2</sub> (2)                                                         | 84                      | 39                     |
|             | O <sub>2</sub> (1)-Na(1)-Na(2)-O <sub>2</sub> (2)-Na(3)*                   | 47                      | 47                     |
|             | Na(1)-Na(2)-O <sub>2</sub> (2)-Na(3)                                       | 149                     | 180                    |
|             | O <sub>2</sub> (1)-Na(2)-O <sub>2</sub> (2)-Na(3)                          | 62                      | 32                     |
|             | Na(2)-O <sub>2</sub> (2)-Na(3)*                                            | 51                      | 51                     |
|             | Na(2)-O <sub>2</sub> (2)                                                   | 49                      | 34                     |
|             | O <sub>2</sub> (2)-Na(3)                                                   | 50                      | 35                     |
|             | O <sub>2</sub> (2)                                                         | 63                      | 32                     |
|             | Na(2)                                                                      | 102                     | 117                    |
| (1120)      | Na(1)-Na(2)-Na(3)-Na(4)-O <sub>2</sub> (1)-O <sub>2</sub> (2)              | 136                     | 162                    |
|             | Na(2)-Na(3)-Na(4)-O <sub>2</sub> (1)-O <sub>2</sub> (2)                    | 103                     | 120                    |
|             | Na(3)-Na(4)-O <sub>2</sub> (1)-O <sub>2</sub> (2)*                         | 32                      | 32                     |
|             | Na(4)-O <sub>2</sub> (1)-O <sub>2</sub> (2)                                | 40                      | 31                     |
|             | O <sub>2</sub> (1)-O <sub>2</sub> (2)                                      | 62                      | 35                     |
|             | O <sub>2</sub> (1)                                                         | 102                     | 111                    |
|             | O <sub>2</sub> (2)                                                         | 79                      | 70                     |
| (1101)      | Na(1)-O <sub>2</sub> (1)-Na(2)-O <sub>2</sub> (2)-Na(3)-O <sub>2</sub> (3) | 52                      | 57                     |
|             | O <sub>2</sub> (1)-Na(2)-O <sub>2</sub> (2)-Na(3)-O <sub>2</sub> (3)       | 41                      | 26                     |
|             | Na(2)-O <sub>2</sub> (2)-Na(3)-O <sub>2</sub> (3)                          | 77                      | 82                     |
|             | O <sub>2</sub> (1)-O <sub>2</sub> (2)-Na(3)-O <sub>2</sub> (3)             | 73                      | 38                     |
|             | O <sub>2</sub> (1)-Na(2)-Na(3)-O <sub>2</sub> (3)                          | 65                      | 70                     |
|             | O <sub>2</sub> (1)-Na(3)-O <sub>2</sub> (3)                                | 56                      | 41                     |
|             | Na(2)-Na(3)-O <sub>2</sub> (3)                                             | 125                     | 150                    |
|             | O <sub>2</sub> (2)-Na(3)-O <sub>2</sub> (3)                                | 75                      | 60                     |
|             | Na(3)-O <sub>2</sub> (3)                                                   | 77                      | 82                     |
|             | Na(3)                                                                      | 124                     | 148                    |
| (1121)      | O <sub>2</sub> (3)                                                         | 54                      | 49                     |
|             | Na(1)-O <sub>2</sub> (1)-Na(2)-O <sub>2</sub> (2)-Na(3)*                   | 45                      | 45                     |
|             | O <sub>2</sub> (1)-Na(2)-O <sub>2</sub> (2)-Na(3)                          | 56                      | 41                     |
|             | Na(2)-O <sub>2</sub> (2)-Na(3)*                                            | 76                      | 76                     |
|             | Na(2)-Na(3)                                                                | 148                     | 177                    |
|             | Na(3)                                                                      | 98                      | 112                    |
|             | O <sub>2</sub> (2)-Na(3)                                                   | 60                      | 46                     |
|             | O <sub>2</sub> (2)                                                         | 203                     | 174                    |

**Table S3.** Surface energies of Na<sub>2</sub>O<sub>2</sub> for all possible terminations. The star symbols (\*) indicate stoichiometric surfaces. (in meV/Å<sup>2</sup>)



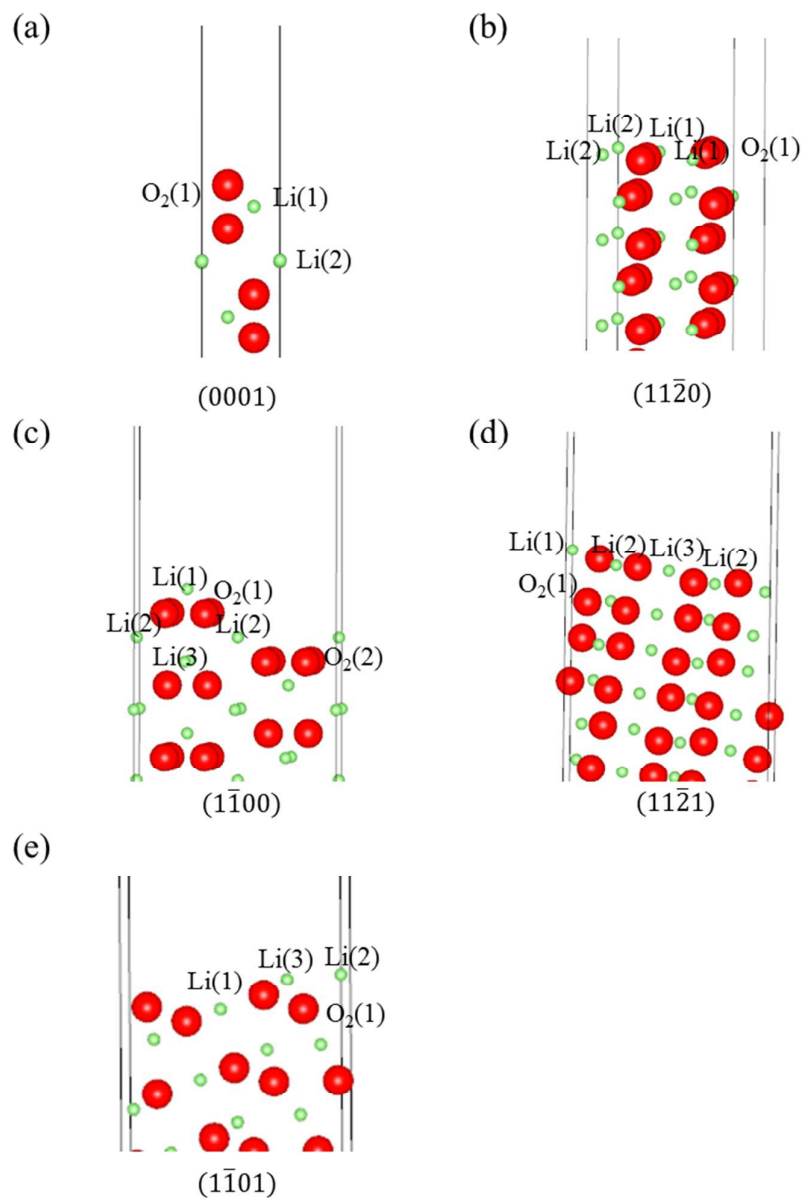

**Figure S5.** Surface unit cells of  $\text{Li}_2\text{O}_2$ . The green and red atoms correspond to lithium and oxygen, respectively. Five low-index surfaces were considered.

| Orientation      | Termination                                             | Li <sub>2</sub> O limit | O <sub>2</sub> limit |
|------------------|---------------------------------------------------------|-------------------------|----------------------|
| (0001)           | O(1)-Li(1)-O(2)-Li(2)                                   | 38                      | 32                   |
|                  | Li(1)-O(2)-Li(2)                                        | 65                      | 72                   |
|                  | Li(2)                                                   | 131                     | 138                  |
|                  | O(2)-Li(2)                                              | 224                     | 218                  |
| (1 $\bar{1}$ 00) | Li(1)-O <sub>2</sub> (2)-Li(3)*                         | 35                      | 35                   |
|                  | Li(1)-O <sub>2</sub> (1)-Li(2)-O <sub>2</sub> (2)-Li(3) | 49                      | 45                   |
|                  | O <sub>2</sub> (1)-Li(2)-O <sub>2</sub> (2)-Li(3)       | 68                      | 60                   |
|                  | Li(2)-O <sub>2</sub> (2)-Li(3)*                         | 119                     | 119                  |
|                  | O <sub>2</sub> (2)-Li(3)                                | 42                      | 38                   |
|                  | Li(3)                                                   | 131                     | 136                  |
| (11 $\bar{2}$ 0) | Li(1)-Li(2)-O <sub>2</sub> (1)*                         | 55                      | 55                   |
|                  | Li(2)-O <sub>2</sub> (1)                                | 47                      | 42                   |
|                  | Li(1)-O <sub>2</sub> (1)                                | 49                      | 44                   |
|                  | O <sub>2</sub> (1)                                      | 52                      | 42                   |
| (1 $\bar{1}$ 01) | Li(1)-Li(2)-Li(3)-O <sub>2</sub> (1)                    | 78                      | 76                   |
|                  | Li(1)-Li(2)-O <sub>2</sub> (1)                          | 84                      | 78                   |
|                  | Li(1)-Li(3)-O <sub>2</sub> (1)                          | 91                      | 84                   |
|                  | Li(2)-Li(3)-O <sub>2</sub> (1)                          | 102                     | 92                   |
|                  | Li(1)-O <sub>2</sub> (1)                                | 93                      | 78                   |
|                  | Li(2)-O <sub>2</sub> (1)                                | 107                     | 92                   |
|                  | Li(3)-O <sub>2</sub> (1)                                | 95                      | 84                   |
|                  | O <sub>2</sub> (1)                                      | 94                      | 74                   |
| (11 $\bar{2}$ 1) | Li(1)-Li(2)-Li(3)-O <sub>2</sub> (1)                    | 56                      | 55                   |
|                  | Li(2)-Li(3)-O <sub>2</sub> (1)                          | 48                      | 41                   |
|                  | Li(1)-Li(3)-O <sub>2</sub> (1)                          | 54                      | 48                   |
|                  | Li(3)-O <sub>2</sub> (1)                                | 56                      | 44                   |

**Table S4.** Surface energies of Li<sub>2</sub>O<sub>2</sub> for all possible terminations. The star symbols (\*) indicate stoichiometric surfaces. (in meV/Å<sup>2</sup>) The energies of terminations were in good agreement with the results of Mo *et al.*; [Reference 13 in the paper] slight differences derive from computational details. Note that Mo *et al.* referred to the (11 $\bar{2}$ 0) surface as (1 $\bar{1}$ 00), (1 $\bar{1}$ 00) as (11 $\bar{2}$ 0), (11 $\bar{2}$ 1) as (1 $\bar{1}$ 01), and (1 $\bar{1}$ 01) as (11 $\bar{2}$ 1). There are no stoichiometric terminations in the (1 $\bar{1}$ 01) and (11 $\bar{2}$ 1) surfaces, but Mo *et al.* considered stoichiometric terminations, resulting in different surface energies, for the (1 $\bar{1}$ 01) and (11 $\bar{2}$ 1) surfaces.

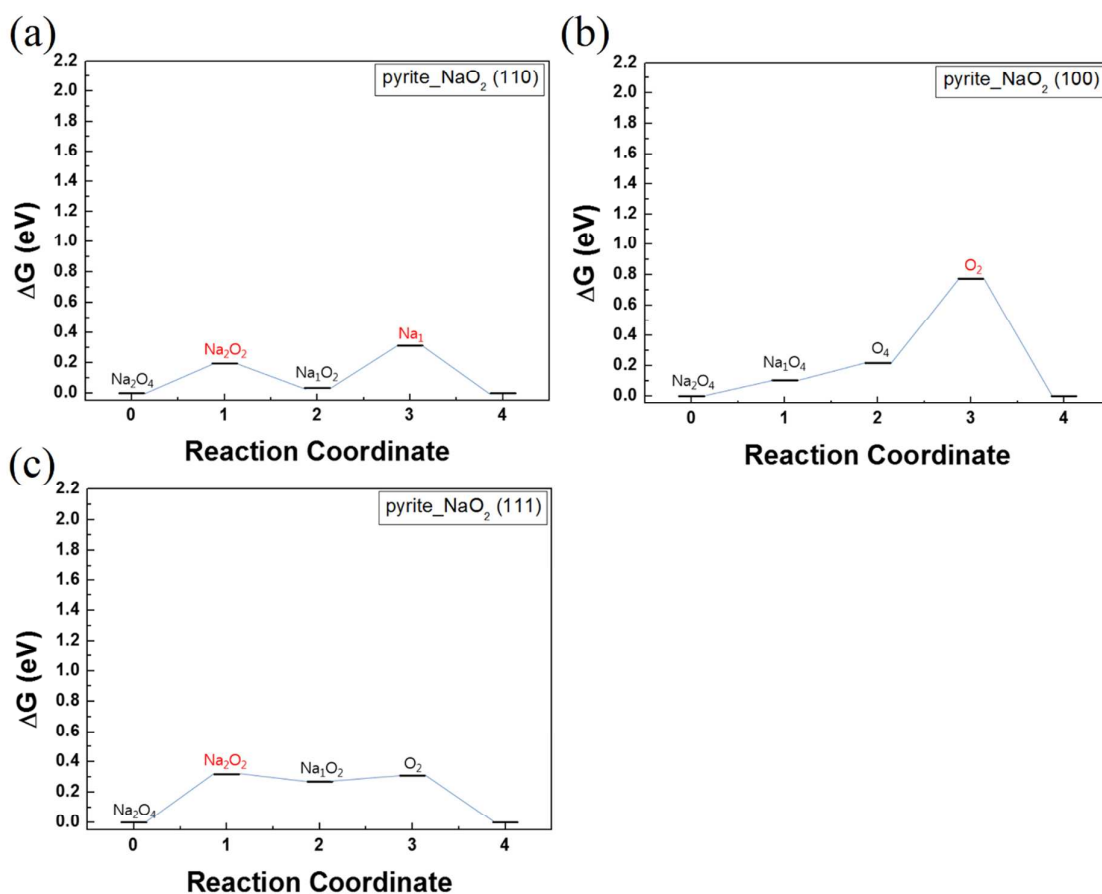

**Figure S6.** The OER energy profile for pyrite  $\text{NaO}_2$ . (a) (100) surface of pyrite  $\text{NaO}_2$ , (b) (110) surface of pyrite  $\text{NaO}_2$ , (c) (111) surface of pyrite  $\text{NaO}_2$ . The most favorable reaction paths are shown. The chemical steps are shown in red.

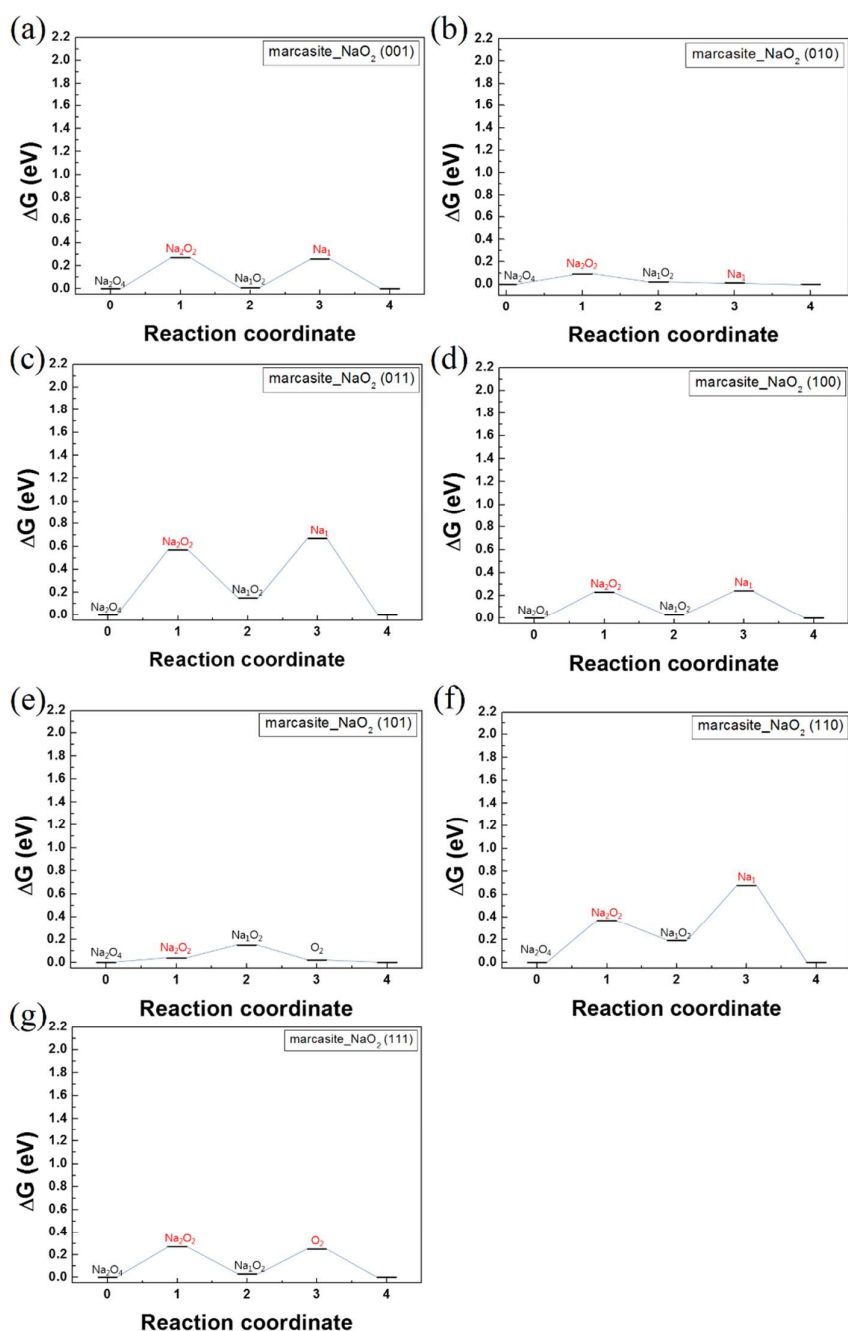

**Figure S7.** The OER energy profile for marcasite  $\text{NaO}_2$ . (a) (001) surface of marcasite  $\text{NaO}_2$ , (b) (010) surface of marcasite  $\text{NaO}_2$ , (c) (011) surface of marcasite  $\text{NaO}_2$ , (d) (100) surface of marcasite  $\text{NaO}_2$ , (e) (101) surface of marcasite  $\text{NaO}_2$ , (f) (110) surface of marcasite  $\text{NaO}_2$ , and (g) (111) surface of marcasite  $\text{NaO}_2$ . The most favorable reaction paths are shown. The chemical steps are shown in red.

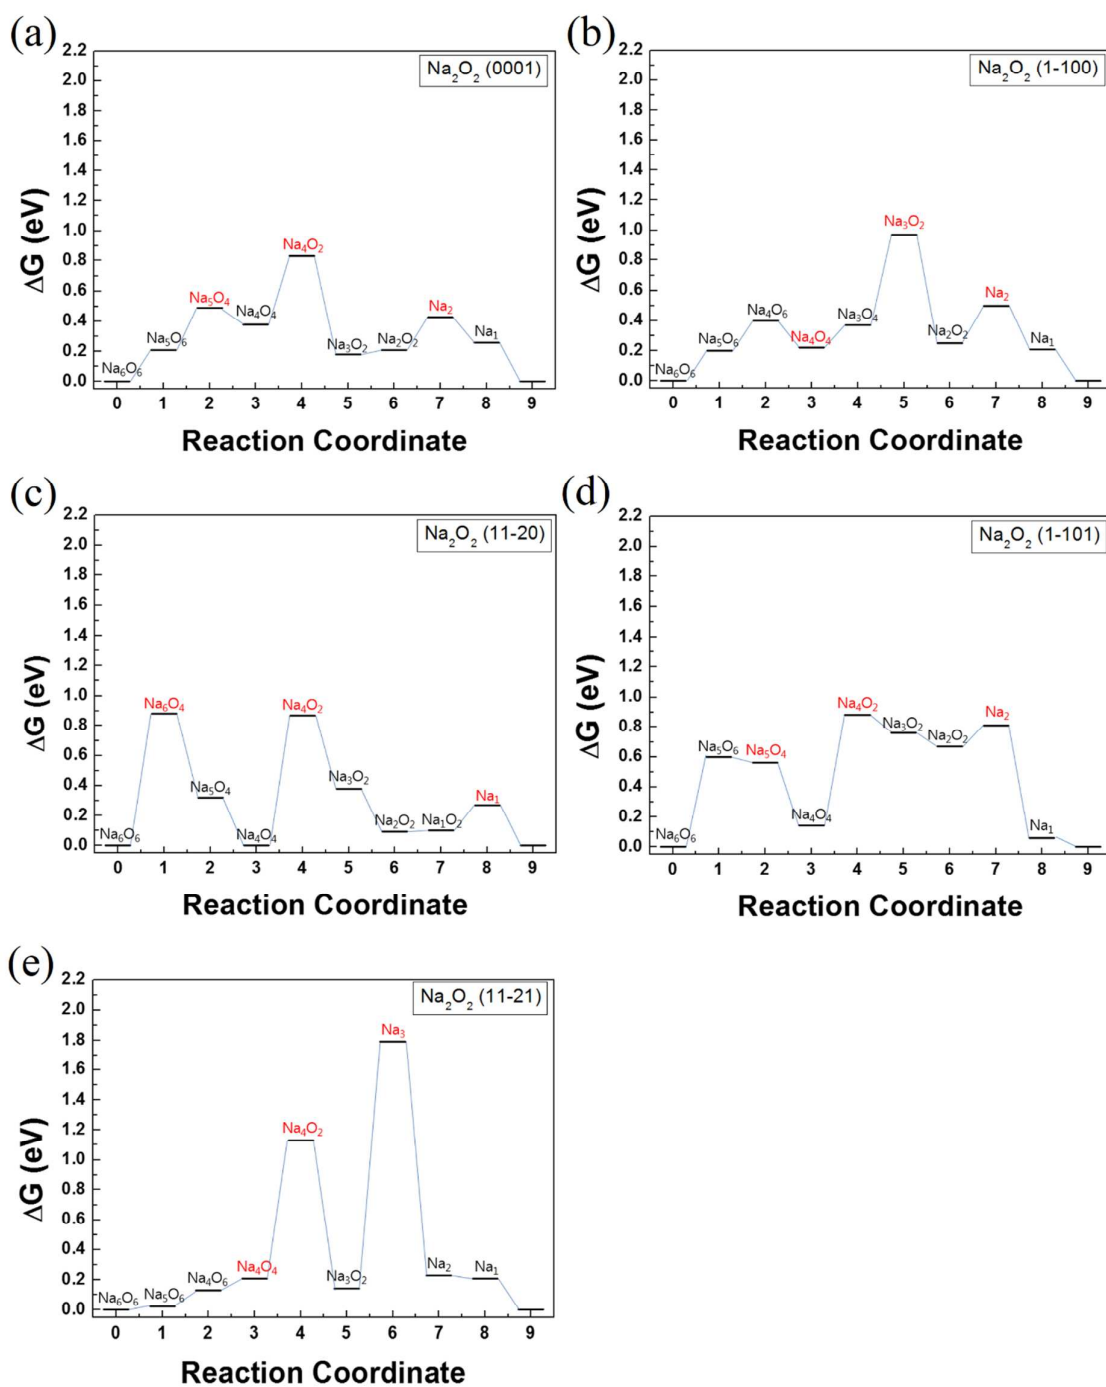

**Figure S8.** The OER energy profile for  $\text{Na}_2\text{O}_2$ . (a) The (0001) surface of  $\text{Na}_2\text{O}_2$ , (b) the (1 $\bar{1}$ 00) surface of  $\text{Na}_2\text{O}_2$ , (c) the (11 $\bar{2}$ 0) surface of  $\text{Na}_2\text{O}_2$ , (d) the (1 $\bar{1}$ 01) surface of  $\text{Na}_2\text{O}_2$ , and (e) the (11 $\bar{2}$ 1) surface of  $\text{Na}_2\text{O}_2$ . The most favorable reaction paths are shown. The chemical steps are shown in red.

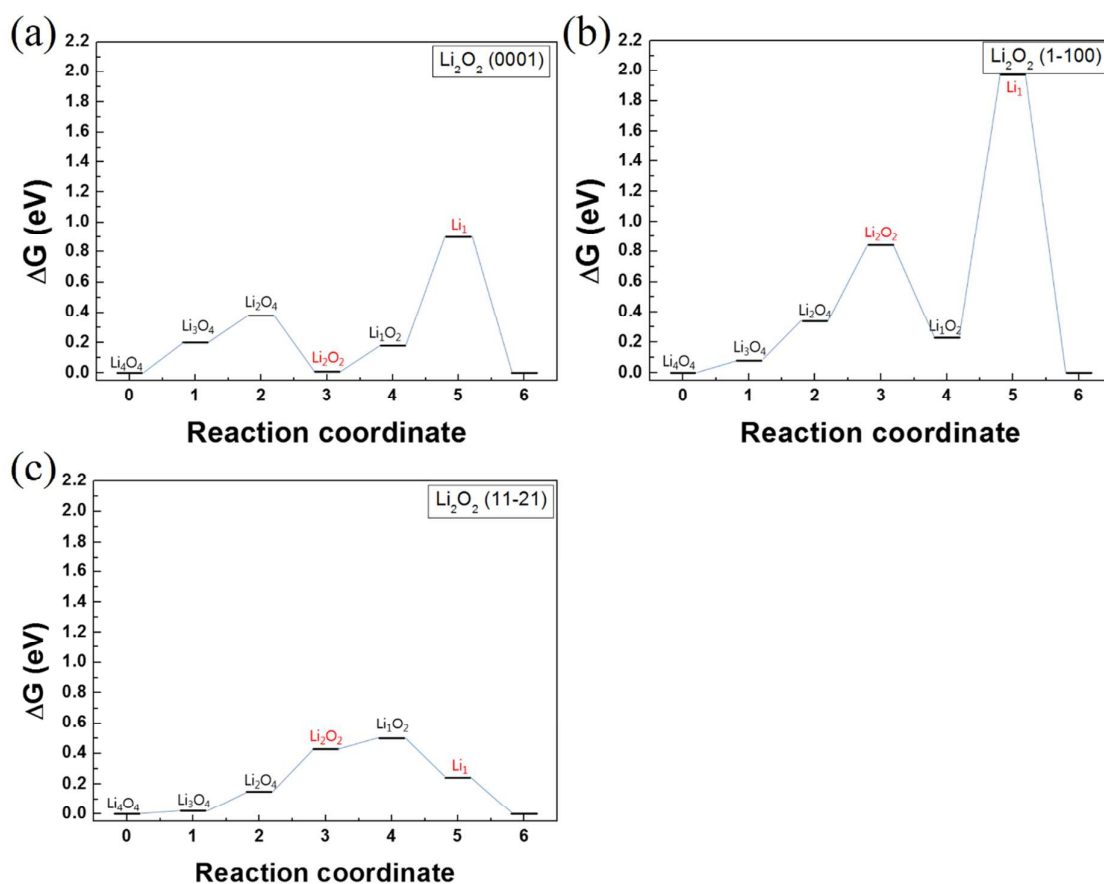

**Figure S9.** The OER energy profile for  $\text{Li}_2\text{O}_2$ . (a) (0001) surface of  $\text{Li}_2\text{O}_2$ , (b) (1 $\bar{1}$ 00) surface of  $\text{Li}_2\text{O}_2$ , and (c) (11 $\bar{2}$ 1) surface of  $\text{Li}_2\text{O}_2$ . The most favorable reaction paths are shown. The chemical steps are shown in red. Since (11 $\bar{2}$ 0) and (1 $\bar{1}$ 01) surfaces cannot be found in Wulff shape, the OER profiles of these surfaces were not calculated.

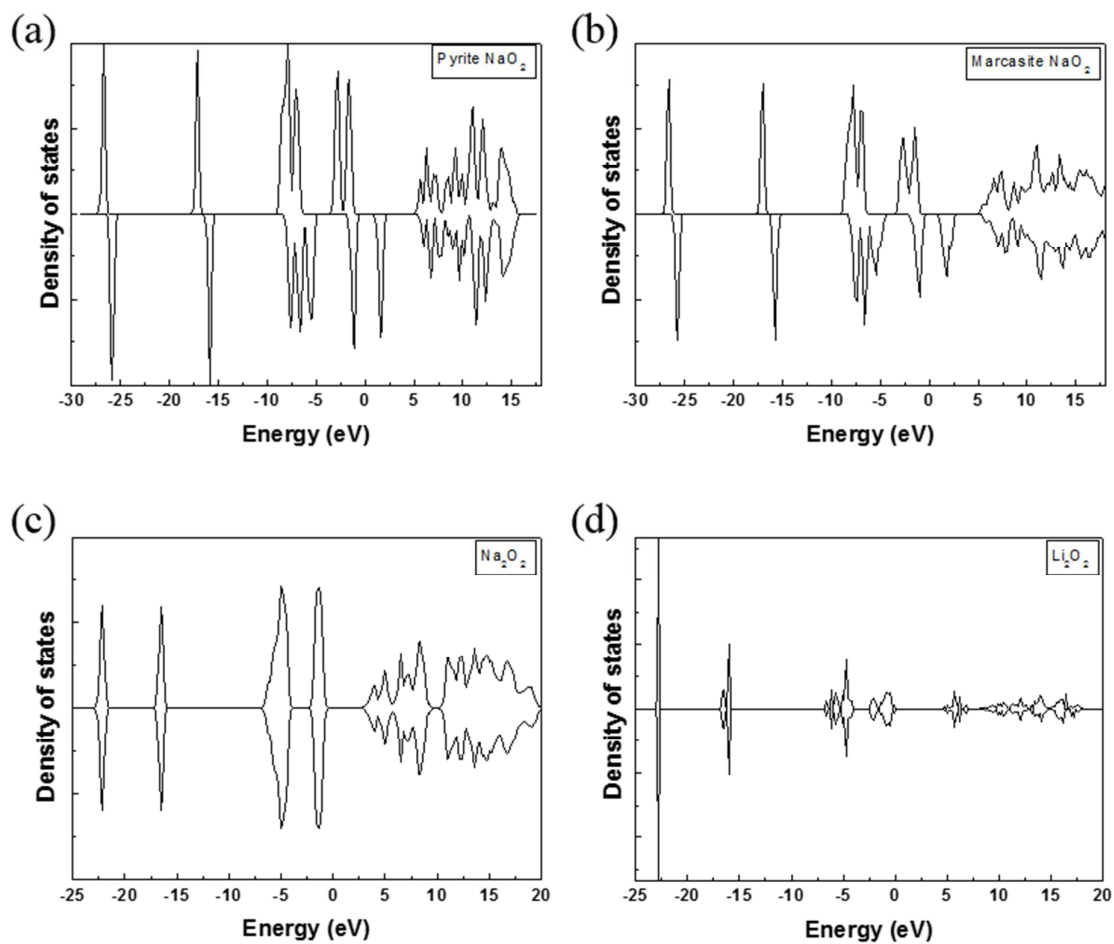

**Figure S10.** Density of state of (a) pyrite  $\text{NaO}_2$ , (b) marcasite  $\text{NaO}_2$ , (c)  $\text{Na}_2\text{O}_2$ , (d)  $\text{Li}_2\text{O}_2$ .
